# Improved multi-type birth-death phylodynamic inference in BEAST 2

Jérémie Scire<sup>1,2</sup>, Joëlle Barido-Sottani<sup>1,2</sup>, Denise Kühnert<sup>3</sup>, Timothy G. Vaughan<sup>1,2</sup>, Tanja Stadler<sup>1,2,\*</sup>

<sup>1</sup> Department for Biosystems Science and Engineering, ETH Zürich, Basel, 4058, Switzerland

<sup>2</sup> Swiss Institute of Bioinformatics, 1015 Lausanne, Switzerland

<sup>3</sup> Transmission, Infection, Diversification and Evolution Group, Max Planck Institute for the Science of Human History, 07745 Jena, Germany

\*To whom correspondence should be addressed: [tanja.stadler@bsse.ethz.ch](mailto:tanja.stadler@bsse.ethz.ch)

## Abstract

The multi-type birth-death model with sampling is a phylodynamic model which enables quantification of past population dynamics in structured populations, based on phylogenetic trees. The BEAST 2 package *bdmm* implements an algorithm for numerically computing the probability density of a phylogenetic tree given the population dynamic parameters under this model. In the initial release of *bdmm*, analyses were limited to trees consisting of up to approximately 250 genetic samples for numerical reasons. We implemented important algorithmic changes to *bdmm* which dramatically increase the number of genetic samples that can be analyzed, and improve the numerical robustness and efficiency of the calculations. Being able to use bigger datasets leads to improved precision of parameter estimates. Furthermore, we report on several model extensions to *bdmm*, inspired by properties common to empirical datasets. We apply this improved algorithm to two partly overlapping datasets of Influenza A virus HA sequences sampled around the world, one with 500 samples, the other with only 175, for comparison. We report and compare the global migration patterns and seasonal dynamics inferred from each dataset.

**Availability:** The latest release with our updates, *bdmm* 0.3.5, is freely available as an open access package of BEAST 2. The source code can be accessed at <https://github.com/denisekuehnert/bdmm>.

**Keywords:** *phylogenetics, Bayesian inference, phylodynamics, population structure*

## Introduction

Genetic sequencing data taken from a measurably evolving population contain fingerprints of past population dynamics [Felsenstein, 1992]. In particular, the phylogeny spanning the sampled genetic data contains information about the mixing pattern of different populations and thus

24 contains information beyond what is encoded in classic occurrence data, see e.g. Hey and  
25 Machado [2003], Stadler and Bonhoeffer [2013b]. Phylodynamic methods [Grenfell et al., 2004,  
26 Kühnert et al., 2011] aim at quantifying past population dynamic parameters, such as migration  
27 rates, from genetic sequencing data. Such tools have been widely used to study the spread of  
28 infectious diseases in structured populations, see e.g. Dudas et al. [2017], Faria et al. [2018] as  
29 examples for analyses of recent epidemic outbreaks. Both the host population and the pathogen  
30 population may be structured, e.g. the host population may be geographically structured, and the  
31 pathogen population may consist of a drug-sensitive and a drug-resistant subpopulation.  
32 Understanding how these subpopulations interact with one another, whether they are separated by  
33 geographic distance, lifestyles of the hosts, or other barriers, is a key determinant in  
34 understanding how an epidemic spreads. In macroevolution, different species may also be  
35 structured into different “subpopulations”, e.g. due to their geographic distribution or to trait  
36 variations, see e.g. Hodges [1997]. Phylodynamic tools aim at quantifying the rates at which  
37 species migrate or traits are gained or lost, and the rates of speciation and extinction within the  
38 “subpopulations”, see e.g. Goldberg et al. [2010], Mayrose et al. [2011], Goldberg et al. [2011].  
39 The phylodynamic analysis of structured populations can be performed using two classes of  
40 models, namely coalescent-based and birth-death-based approaches. Both have their unique  
41 advantages and disadvantages [Volz and Frost, 2014, Boskova et al., 2014]. Here, we report on  
42 improvements to a multi-type birth-death-based approach.  
43 A multi-type birth-death model is a linear birth-death model accounting for structured  
44 populations. Under this model, the probability density of a phylogenetic tree can be calculated by  
45 numerically integrating a system of differential equations. The use of this model within a  
46 phylodynamic setting and the associated computational approach were initially proposed for  
47 analyzing species phylogenies [Maddison et al., 2007] and later for analyzing pathogen  
48 phylogenies [Stadler and Bonhoeffer, 2013a, Volz and Frost, 2014]. The package *bdmm* within  
49 the Bayesian phylodynamic inference framework BEAST2 [Bouckaert et al., 2014] generalizes  
50 the assumptions of these two initial approaches [Kühnert et al., 2016]. It further allows for  
51 co-inferring phylogenetic trees together with the model parameters and thus takes phylogenetic  
52 uncertainty explicitly into account. Datasets containing more than 250 genetic sequences could  
53 not be analysed using the original *bdmm* package [Kühnert et al., 2016] due to numerical

54 instability. This limitation was a strong impediment to obtaining reliable results, particularly for  
55 analysis of structured populations, as quantifying parameters which characterize each  
56 subpopulation requires a significant amount of samples from each of them. The instability was  
57 due to numerical underflow in the probability density calculations, meaning that probability  
58 values extremely close to zero could not be accurately calculated and stored. We have solved the  
59 numerical instability issue of *bdtmm*, thereby lifting the hard limit on the number of samples that  
60 can be analysed. In addition, the practical usefulness of the *bdtmm* package was previously  
61 restricted by the amount of computation time required to carry out analyses. We report here on  
62 significant improvements in computation efficiency. As a result, *bdtmm* can now handle datasets  
63 containing several hundred genetic samples. Finally, we made the multi-type birth-death model  
64 more general in several ways: homochronous sampling events can now occur at multiple times  
65 (not only the present), individuals are no longer necessarily removed upon sampling, and the  
66 migration rate specification has been made more flexible by allowing for piecewise-constant  
67 changes through time.

68 Overall, these model generalizations and implementation improvements enable more reliable and  
69 ambitious empirical data analyses. Below, we use the new release of *bdtmm* to quantify Influenza  
70 A virus spread around the globe as an example application, and compare the results obtained with  
71 those from the reduced dataset analysed in [Kühnert et al., 2016].

## 72 **Methods**

### 73 **Description of the extended multi-type birth-death model**

74 First, we formally define the multi-type birth-death model on  $d$  types [Kühnert et al., 2016]  
75 including the generalizations introduced in this work. The process starts at time 0 with one  
76 individual, this is also called the origin of the process and the origin of the resulting tree. This  
77 individual is of type  $i \in \{1 \dots d\}$ , with probability  $h_i$  (where  $\sum_{i=1}^d h_i = 1$ ). The process ends  
78 after  $T$  time units (at present). The time interval  $(0, T)$  is partitioned into  $n$  intervals through  
79  $0 < t_1 < \dots < t_{n-1} < T$ , and we define  $t_0 := 0$  and  $t_n := T$ . Each individual at time  $t$ ,  
80  $t_{k-1} \leq t < t_k$ ,  $k \in \{1 \dots n\}$  of type  $i \in \{1 \dots d\}$ , gives rise to an additional individual of type

81  $j \in \{1 \dots d\}$ , with birth rate  $\lambda_{ij,k}$ , migrates to type  $j$  with rate  $m_{ij,k}$  (with  $m_{ii,k} = 0$ ), dies with  
82 rate  $\mu_{i,k}$ , and is sampled with rate  $\psi_{i,k}$ . At time  $t_k$ , each individual of type  $i$  is sampled with  
83 probability  $\rho_{i,k}$ . Upon sampling (either with rate  $\psi_{i,k}$  or probability  $\rho_{i,k}$ ), the individual is  
84 removed from the infectious pool with probability  $r_{i,k}$ . We summarize all birth-rates  $\lambda_{ij,k}$  in  $\boldsymbol{\lambda}$ ,  
85 migration rates  $m_{ij,k}$  in  $\boldsymbol{m}$ , death rates  $\mu_{i,k}$  in  $\boldsymbol{\mu}$ , sampling rates  $\psi_{i,k}$  in  $\boldsymbol{\psi}$ , sampling probabilities  
86  $\rho_{i,k}$  in  $\boldsymbol{\rho}$  and removal probabilities  $r_{i,k}$  in  $\boldsymbol{r}$ ,  $i, j \in \{1, \dots, d\}, k \in \{1, \dots, n\}$ . The model  
87 described in Kühnert et al. [2016] is a special case of the above, assuming that migration rates are  
88 constant through time (i.e. do not depend on  $k$ ), removal probabilities are constant through time  
89 and across types (i.e. do not depend on  $k$  and  $i$ ), and that  $\rho_{i,k} = 0$  for  $k < n$  and  $i \in \{1 \dots d\}$ .  
90 This process gives rise to complete trees on sampled and non-sampled individuals with types  
91 being assigned to all branches at all times (Figure 1, left). Following each branching event, one  
92 offspring is assigned to be the “left” offspring, and one the “right” offspring, each assignment has  
93 probability  $\frac{1}{2}$ . In the figure, we draw the branch with assignment “left” on the left and the branch  
94 with assignment “right” on the right. Such trees are called oriented trees, and considering  
95 oriented trees will facilitate calculations of probability densities of trees. Pruning all lineages  
96 without sampled descendants leads to the *sampled phylogeny* (Figure 1, middle and right). The  
97 orientation of a branch in the sampled phylogeny is the orientation of the corresponding branch  
98 descending the common branching event in the complete tree. When the sampled phylogeny is  
99 annotated with the types along each branch, we refer to it as a *branch-typed tree* (Figure 1,  
100 middle). On the other hand, if we discard these annotations but keep the types of the sampled  
101 individuals, we call the resulting object a *sample-typed (or tip-typed) tree* (Figure 1, right).  
102 Below, we state the probability density of the sampled tree (i.e. the sample-typed or branch-typed  
103 tree) given the multi-type birth–death parameters  $\boldsymbol{\lambda}, \boldsymbol{m}, \boldsymbol{\mu}, \boldsymbol{\psi}, \boldsymbol{\rho}, \boldsymbol{r}, T$ . This probability density is  
104 obtained by integrating probability densities  $g$  from the leaf nodes (or “tips”), backwards along  
105 all edges (or “branches”), to the origin of the tree. Our notation here is based on previous work  
106 [Kühnert et al., 2016, Stadler et al., 2013], and the probabilities  $p_{i,k}(t)$  and  $g_{i,k}^e(t)$  relate to  $E$  and  
107  $D$  in Maddison et al. [2007], Stadler and Bonhoeffer [2013a], respectively.  
108 Every branching event in the sampled tree gives rise to a node with degree 3 (i.e. 3 branches are  
109 attached). Every sampling event gives rise to a node of degree 2 (called “sampled ancestor”) or 1  
110 (called “tip”, as defined above). A sampling event at time  $t = t_k, k \in \{1, \dots, n\}$ , is referred to as

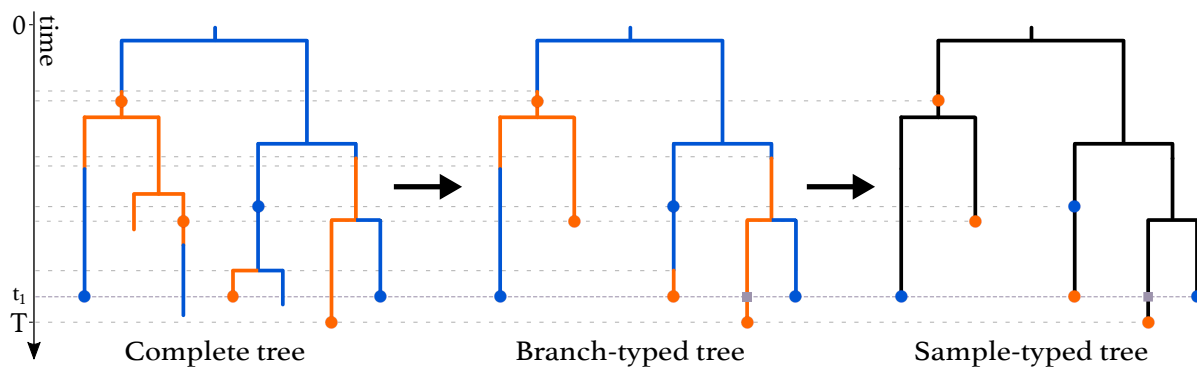

Figure 1: Complete tree (left) and sampled trees (middle and right) obtained from a multi-type birth-death process with two types. The orange and blue dots on the trees represent sampled individuals and are coloured according to the type these individuals belong to. A  $\rho$ -sampling event happens at time  $t_1$ . The grey squares represent degree-2 nodes added to branches crossing this event.  $\rho$ -sampling also happens at present (time  $T$ ). As seen in the complete tree, the first three individuals who were sampled were not removed from the population upon sampling, while the four individuals giving rise to the later samples were removed upon sampling.

111 a  $\rho$ -sampled node. All other nodes corresponding to samples are referred to as  $\psi$ -sampled nodes.  
 112 Further, degree-2 nodes are put at time  $t_k$  on all lineages crossing time  $t_k$ ,  $k = 1, \dots, n - 1$  as  
 113 shown at time  $t_1$  in Figure 1. In a branch-typed tree, a node of degree 2 also occurs on a lineage at  
 114 a time point when a type-change occurs. Such type changes may be the result of either migrations  
 115 or birth events in which one of the descendant subtrees is unsampled (Figure 1, middle).  
 116 We highlight that in *bdmm*, we assume that the most recent sampling event happens at time  $T$ .  
 117 This is equivalent to assuming that the sampling effort was terminated directly after the last  
 118 sample was collected, and overcomes the necessity for users to specify the time between the last  
 119 sample and the termination of the sampling effort at time  $T$ .  
 120 The derivation of the probability density of a sampled tree under the extended multi-type  
 121 birth-death model is developed in Supplementary Information (SI) (section S1).

## 122 Implementation improvements

123 The computation of probability densities of sampled trees under the multi-type birth-death model  
 124 require numerically solving Ordinary Differential Equations (ODEs) along each tree branch. We  
 125 significantly improved the robustness of the original *bdmm* implementation, which suffered from  
 126 instabilities caused by underflow of these numerical calculations. Compared to the original  
 127 implementation, we prevent underflow by implementing an extended precision floating point

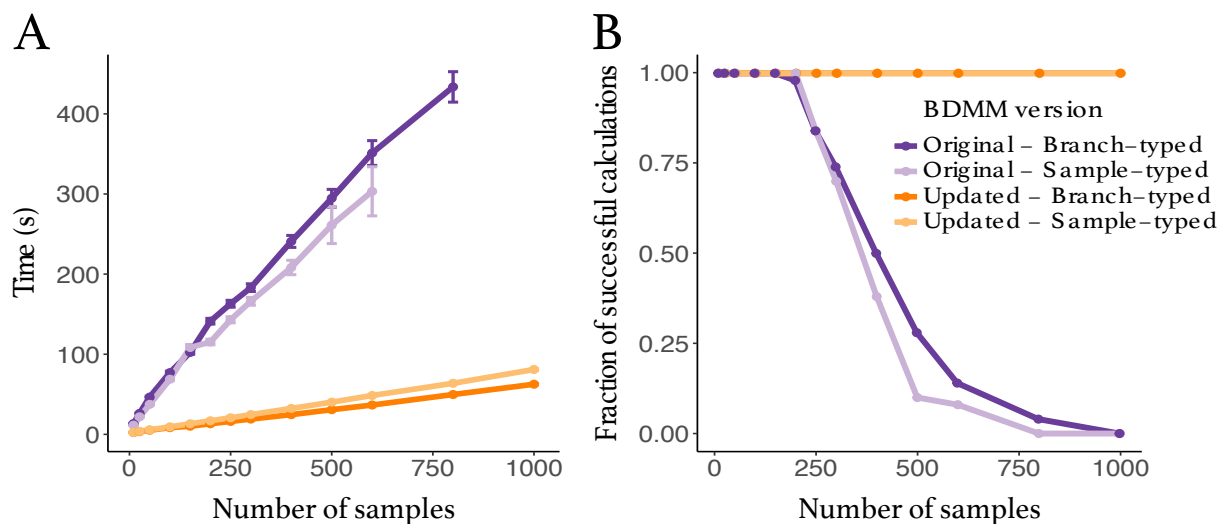

Figure 2: Comparison between the original and updated implementation of the multi-type birth-death model. **A**: Speed comparison. Only successful calculations were taken into account i.e. calculations where the log-probability density was different from  $-\infty$ . **B**: Success in calculating probability density values plotted against tree size. The values presented in this panel correspond to the same set of calculations as the one in panel A.

128 representation (EPFP) for storing intermediary calculation results. Additional to this  
129 improvement in stability, we improved the efficiency of the probability density calculations, by 1)  
130 using an adaptive-step-size integrator for numerical integration, 2) performing preliminary  
131 calculations and storing the results for use during the main calculation step and 3) distributing  
132 calculations among threads running in parallel. Details can be found in SI section S2.

## 133 Results

### 134 Evaluation of numerical improvements

135 We compared the robustness and efficiency of the improved *bdmm* package against its original  
136 version. We considered varying tree sizes, between 10 and 1000 samples. For each tree size, we  
137 simulated 50 branch-typed and 50 sample-typed trees under the multi-type birth-death model  
138 using randomly-drawn parameter values from the distributions shown in SI Table S1. For each  
139 simulated tree, we measured the time taken to perform the calculation of the probability density  
140 given the parameter values under which the tree was simulated, using the updated and the  
141 original *bdmm* implementation. We report the wall-clock time taken to perform this calculation  
142 5000 times (Fig. 2). All computations are performed on a MacBook Pro with a dual-core 2.3

143 GHz Intel Core i5 processor. The new implementation of *bdmm* is on average 9 times faster than  
144 the original (Fig. 2A). The robustness of the updated implementation is demonstrated by  
145 reporting how often the implementations return  $-\infty$  for the probability density in log space. We  
146 call these calculations “failures”, the most likely cause of error being underflow. Our new  
147 implementation shows no calculation failure for trees with up to 1000 samples, while in the  
148 original implementation calculations often fail for trees with more than 250 samples (Fig. 2B).

## 149 **Influenza A virus (H3N2) analysis**

150 As an example of a biological question which can be investigated with *bdmm*, we analysed 500  
151 H3N2 influenza virus HA sequences sampled around the globe from 2000 to 2006 and aim to  
152 recover the seasonal dynamics of the global epidemics. The dataset is a subset of the data  
153 analysed by Vaughan et al. [2014], taken from three different regions around the globe: New  
154 York (North,  $n = 167$ ), New Zealand (South,  $n = 215$ ) and Hong Kong (Tropics,  $n = 118$ ). As a  
155 comparison, we performed an identical analysis with the H3N2 influenza dataset of 175  
156 sequences sampled between 2003 and 2006 used in [Kühnert et al., 2016]. This dataset of 175  
157 sequences was also a subset of the data by Vaughan et al. [2014], and it also groups samples from  
158 3 locations denoted as North (for northern hemisphere), South (for southern hemisphere) and  
159 Tropic (for tropical regions). Note that the latter dataset comes from more geographically-spread  
160 samples and thus we do not expect results from both analysis to be perfectly comparable. As we  
161 deal with pathogen sequence data, we adopt the epidemiological parametrization of the  
162 multi-type birth-death model as detailed in Kühnert et al. [2016]. The epidemiological  
163 parametrization substitutes birth, death and sampling rates with effective reproduction numbers  
164 within types, rate at which hosts become noninfectious and sampling proportions. To study the  
165 seasonal dynamics of the global epidemic, we allow the effective reproduction number  $R_e$  to vary  
166 through time. To do so, we subdivide time into six-month intervals (starting April 1st and  
167 October 1st) and we constrain effective reproduction number values corresponding to the same  
168 season across different years to be equal for each particular location. Further details on the data  
169 analysis configuration can be found in Supplementary section S3.

170 The analysis of the larger dataset (500 samples) allows for the reconstruction of the evolutionary  
171 tree encompassing a longer time period, and therefore gives a more long-term and detailed view



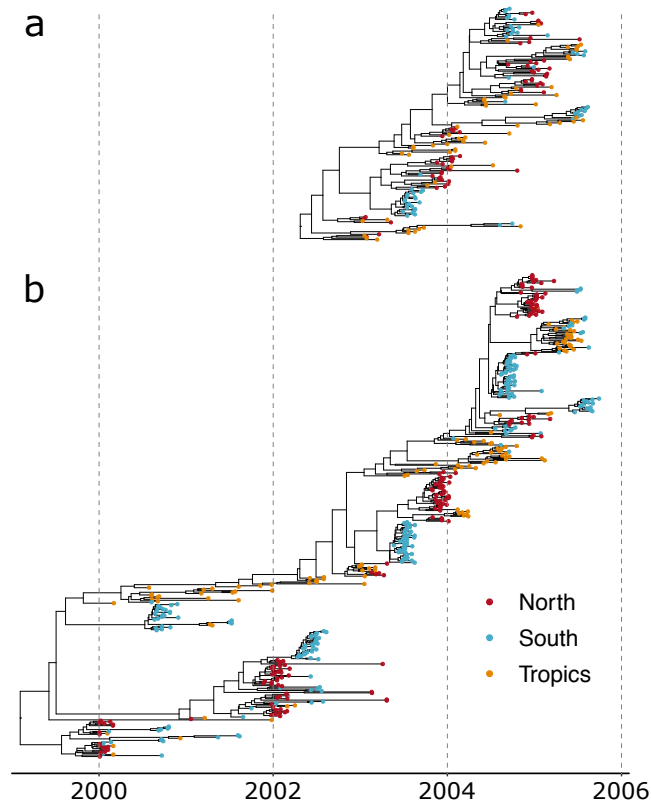

Figure 3: Maximum-Clade Credibility (MCC) trees for analyses with 175 samples (a) and 500 samples (b).

172 of the evolution of the global epidemic (see Fig 3 for the Maximum-Clade Credibility trees).  
173 As can be expected for the tropical location, in both analyses, effective reproduction numbers for  
174 H3N2 influenza A are inferred to be close to one year-round (Fig 4A). Conversely, strong  
175 seasonal variations can be observed in Northern and Southern hemisphere locations. There, the  
176 effective reproduction number is close to one in winter, while it is much lower in summer.  
177 Inferences from the small and large datasets are mostly in agreement. A subtle difference  
178 appears: in the larger dataset, the effective reproduction number in winter seasons and in the  
179 tropical location are closer to one, with less variation across estimates. This seems to indicate  
180 that the variations between estimates observed with the smaller dataset including samples from  
181 2003 to 2006 (for instance  $R_e$  in winter in the North compared to  $R_e$  in winter in the South) are  
182 due to stochastic fluctuations which are averaged out when considering a longer period of  
183 transmission dynamics in the larger dataset covering the years 2000 to 2006.  
184 Precise inference of migration rates is more difficult, as is reflected by the significant uncertainty  
185 we obtain on the estimates (Fig 4B). Still, we observe in general that the uncertainty is reduced  
186 for the inference performed with the larger dataset, as expected. A significant difference between



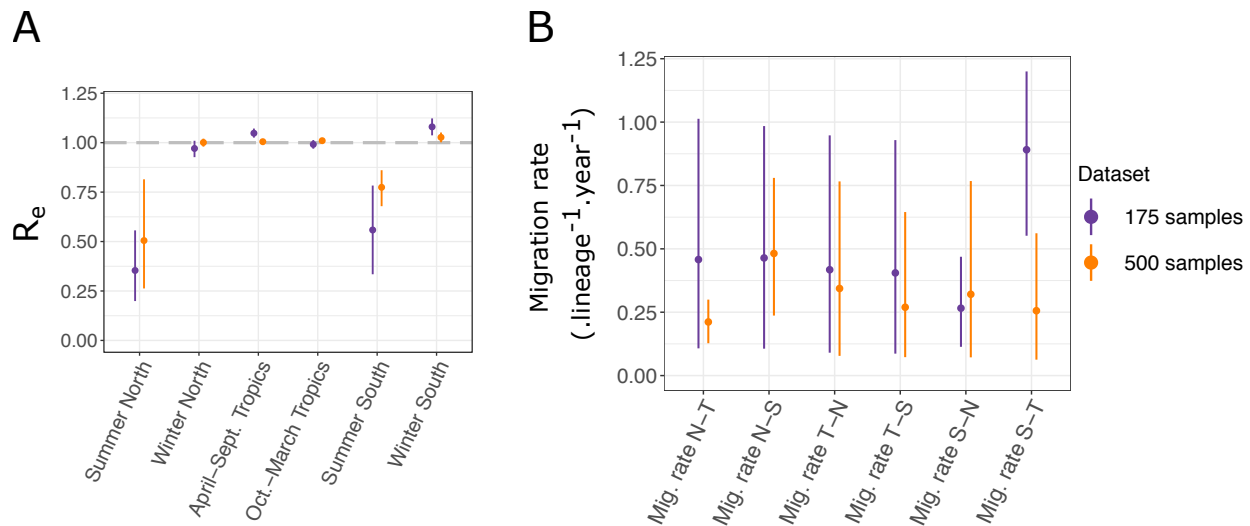

Figure 4: **A:** Seasonal effective reproduction numbers for each sample location, for both datasets. **B:** Migration rates inferred for each dataset. N, T and S refer respectively to North, South and Tropics. For instance, “*Mig. rate N-T*” represents the migration rate from the Northern location to the Tropical one.

187 the migration rates inferred from the Southern to Tropical locations arises between the two  
 188 analysis. With the larger dataset, the estimated rate is much lower than with the smaller one, and  
 189 more in range with the other migration rate estimates. Detailed results of all the parameter  
 190 estimates for both analyses are available in Table S3. Most notably, estimates of root locations  
 191 for both datasets are very similar. In both cases, the tropical location is the most likely location  
 192 for the root; however, neither of the two other locations can be entirely excluded.

## 193 Discussion

194 The multi-type birth-death model with its updated implementation in the *bdmm* package for  
 195 BEAST 2 provides a flexible method for taking into account the effect of population structure  
 196 when performing phylodynamic genetic sequence analysis. Compared to the original  
 197 implementation, we now prevent underflow of numerical calculations and speed up calculations  
 198 by almost an order of magnitude. The size limit of around 250 samples for datasets which could  
 199 be handled by *bdmm* is thus lifted and significantly larger datasets can now be analysed. We  
 200 demonstrate this improvement by analysing two datasets of Influenza A virus H3N2 genetic data  
 201 from around the globe. One dataset has 500 samples and could not have been analyzed with the  
 202 original version of *bdmm*, the other one contains 175 samples and is the original example dataset

203 analyzed in [Kühnert et al., 2016]. Overall, we observe, as could be expected, that analysing a  
204 dataset with more samples gives a more long-term picture of the global transmission patterns and  
205 reduces the general uncertainty on parameter estimates.

206 With the addition of so-called  $\rho$ -sampling events in the past, intense sampling efforts limited to  
207 short periods of time (leading to many samples being taken nearly simultaneously) can be easily  
208 modelled as instantaneous sampling events across the entire population (or sub-population),  
209 rather than as non-instantaneous sampling over small sampling intervals. This simplifies the  
210 modelling of intense pathogen sequencing efforts in very short time windows. When using a  
211 multi-type birth-death model in the macroevolutionary framework,  $\rho$ -sampling can be used to  
212 model fossil samples originating from the same rock layer. By allowing the removal probability  $r$   
213 (the probability for an individual to be removed from the infectious population upon sampling) to  
214 be type-dependent and to vary across time intervals, as well as allowing migration rates between  
215 types to vary across time intervals, we further increase the generality and flexibility of the  
216 multi-type birth-death model.

217 We focused on an epidemiological application of *bdmm*, where we co-infer the phylogenetic trees  
218 to take into account the phylogenetic uncertainty. However, the *bdmm* modelling assumptions are  
219 equally applicable to the analysis of macroevolutionary data, in which context *bdmm* allows for  
220 the joint inference of trees with fossil samples under structured models. In the context of the  
221 exploration of trait-dependent speciation, structured birth-death models such as the binary-state  
222 speciation and extinction model (BiSSE) [Maddison, 2006, FitzJohn, 2012] have been shown to  
223 possibly produce spurious associations between character state and speciation rate when applied  
224 to empirical phylogenies [Rabosky and Goldberg, 2015]. When used in this fashion, users of  
225 *bdmm* should assess the propensity for Type I errors with their dataset through neutral trait  
226 simulations, as suggested by Rabosky and Goldberg [2015].

227 In summary, we expect the new release of *bdmm* to become a standard tool for phylodynamic  
228 analysis of sequencing data and phylogenetic trees from structured populations.

## 229 **Acknowledgements**

230 We thank Nicola Müller, David Rasmussen, Jūlija Pečerska for very valuable discussions and  
231 Fábio Kuriki Mendes for helpful comments on the manuscript.

## 232 Funding

233 T.S. was supported in part by the European Research Council under the Seventh Framework  
234 Programme of the European Commission (PhyPD: grant agreement number 335529).

## 235 References

236 Veronika Boskova, Sebastian Bonhoeffer, and Tanja Stadler. Inference of epidemiological  
237 dynamics based on simulated phylogenies using birth-death and coalescent models. *PLoS*  
238 *computational biology*, 10(11):e1003913, 2014.

239 Remco Bouckaert, Joseph Heled, Denise Kühnert, Tim Vaughan, Chieh-Hsi Wu, Dong Xie,  
240 Marc A Suchard, Andrew Rambaut, and Alexei J Drummond. BEAST 2: a software platform  
241 for Bayesian evolutionary analysis. *PLoS computational biology*, 10(4):e1003537, apr 2014.  
242 ISSN 1553-7358. doi: 10.1371/journal.pcbi.1003537. URL  
243 <http://dx.doi.org/10.1371/journal.pcbi.1003537>.

244 Gytis Dudas, Luiz Max Carvalho, Trevor Bedford, Andrew J Tatem, Guy Baele, Nuno R Faria,  
245 Daniel J Park, Jason T Ladner, Armando Arias, Danny Asogun, et al. Virus genomes reveal  
246 factors that spread and sustained the ebola epidemic. *Nature*, 544(7650):309, 2017.

247 Nuno Rodrigues Faria, Moritz UG Kraemer, SC Hill, J Goes De Jesus, RS Aguiar, Felipe CM  
248 Iani, Joilson Xavier, Josh Quick, L Du Plessis, Simon Dellicour, et al. Genomic and  
249 epidemiological monitoring of yellow fever virus transmission potential. *Science*, 361(6405):  
250 894–899, 2018.

251 Joseph Felsenstein. Estimating effective population size from samples of sequences: inefficiency  
252 of pairwise and segregating sites as compared to phylogenetic estimates. *Genetical Research*,  
253 59(2):139–147, 1992. doi: 10.1017/S0016672300030354.

254 Richard G FitzJohn. Diversitree: comparative phylogenetic analyses of diversification in r.  
255 *Methods in Ecology and Evolution*, 3(6):1084–1092, 2012.

256 Emma E Goldberg, Joshua R Kohn, Russell Lande, Kelly A Robertson, Stephen A Smith, and

- 257 Boris Igić. Species selection maintains self-incompatibility. *Science*, 330(6003):493–495,  
258 2010.
- 259 Emma E Goldberg, Lesley T Lancaster, and Richard H Ree. Phylogenetic inference of reciprocal  
260 effects between geographic range evolution and diversification. *Systematic Biology*, 60(4):  
261 451–465, 2011.
- 262 Bryan T Grenfell, Oliver G Pybus, Julia R Gog, James LN Wood, Janet M Daly, Jenny A  
263 Mumford, and Edward C Holmes. Unifying the epidemiological and evolutionary dynamics of  
264 pathogens. *science*, 303(5656):327–332, 2004.
- 265 Jody Hey and Carlos A Machado. The study of structured populations ? new hope for a difficult  
266 and divided science. *Nature Reviews Genetics*, 4(7):535–543, 2003. ISSN 1471-0064. doi:  
267 10.1038/nrg1112. URL <https://doi.org/10.1038/nrg1112>.
- 268 Scott A Hodges. Floral nectar spurs and diversification. *International Journal of Plant Sciences*,  
269 158(S6):S81–S88, 1997.
- 270 Denise Kühnert, Tanja Stadler, Timothy G. Vaughan, and Alexei J. Drummond. Phylodynamics  
271 with Migration: A Computational Framework to Quantify Population Structure from Genomic  
272 Data. *Molecular Biology and Evolution*, 33(8):2102–2116, 2016. ISSN 15371719. doi:  
273 10.1093/molbev/msw064.
- 274 Denise Kühnert, Chieh-Hsi Wu, and Alexei J. Drummond. Phylogenetic and epidemic modeling  
275 of rapidly evolving infectious diseases. *Infection, Genetics and Evolution*, 11(8):1825 – 1841,  
276 2011. ISSN 1567-1348. doi: <https://doi.org/10.1016/j.meegid.2011.08.005>. URL  
277 <http://www.sciencedirect.com/science/article/pii/S156713481100284X>.
- 278 Wayne P Maddison. Confounding asymmetries in evolutionary diversification and character  
279 change. *Evolution*, 60(8):1743–1746, 2006.
- 280 Wayne P Maddison, Peter E Midford, and Sarah P Otto. Estimating a binary character’s effect on  
281 speciation and extinction. *Systematic biology*, 56(5):701–10, 2007. ISSN 1063-5157. doi:  
282 10.1080/10635150701607033. URL  
283 <http://www.ncbi.nlm.nih.gov/pubmed/17849325>.

- 284 Itay Mayrose, Shing H Zhan, Carl J Rothfels, Karen Magnuson-Ford, Michael S Barker, Loren H  
285 Rieseberg, and Sarah P Otto. Recently formed polyploid plants diversify at lower rates.  
286 *Science*, 333(6047):1257–1257, 2011.
- 287 Daniel L Rabosky and Emma E Goldberg. Model inadequacy and mistaken inferences of  
288 trait-dependent speciation. *Systematic biology*, 64(2):340–355, 2015.
- 289 Tanja Stadler and Sebastian Bonhoeffer. Uncovering epidemiological dynamics in heterogeneous  
290 host populations using phylogenetic methods. *Philosophical transactions of the Royal Society  
291 of London. Series B, Biological sciences*, 368(1614):20120198, 2013a. ISSN 1471-2970. doi:  
292 10.1098/rstb.2012.0198. URL  
293 <http://www.ncbi.nlm.nih.gov/pubmed/23382421>.
- 294 Tanja Stadler and Sebastian Bonhoeffer. Uncovering epidemiological dynamics in heterogeneous  
295 host populations using phylogenetic methods. *Philosophical Transactions of the Royal Society  
296 B: Biological Sciences*, 368(1614):20120198, 2013b. doi: 10.1098/rstb.2012.0198. URL  
297 <https://royalsocietypublishing.org/doi/abs/10.1098/rstb.2012.0198>.
- 298 Tanja Stadler, Denise Kühnert, Sebastian Bonhoeffer, and Alexei J Drummond. Birth-death  
299 skyline plot reveals temporal changes of epidemic spread in HIV and hepatitis C virus ( HCV  
300 ). *Pnas*, 110(1):228–233, 2013. ISSN 1091-6490. doi: 10.1073/pnas.1207965110/  
301 /DCSupplemental.[www.pnas.org/cgi/doi/10.1073/pnas.1207965110](http://www.pnas.org/cgi/doi/10.1073/pnas.1207965110).
- 302 Timothy G. Vaughan, Denise Kühnert, Alex Poppinga, David Welch, and Alexei J. Drummond.  
303 Efficient Bayesian inference under the structured coalescent. *Bioinformatics*, 30(16):  
304 2272–2279, 04 2014. ISSN 1367-4803. doi: 10.1093/bioinformatics/btu201. URL  
305 <https://doi.org/10.1093/bioinformatics/btu201>.
- 306 Erik M Volz and Simon DW Frost. Sampling through time and phylodynamic inference with  
307 coalescent and birth–death models. *Journal of The Royal Society Interface*, 11(101):20140945,  
308 2014.
